# Supplementary material
Source: PubMed Central journal article supplement (PMC5659741)
Supplement: NIHMS903448-supplement-Supplementary_Table_1.pdf [file NIHMS903448-supplement-Supplementary_Table_1.pdf]

Supplementary Table 1: Design of the rtPCR murine primers

| Murine Gene    | Primer Sequences                    |
|----------------|-------------------------------------|
| IFN- $\gamma$  | fwd 5'-AGCTCATCCGAGTGGTCCAC-3'      |
|                | rev 5'-GCTTCCTGAGGCTGGATTCC-3'      |
| IL-17          | fwd 5'-GAAGCTCAGTGCCGCCA-3'         |
|                | rev 5'-TTCATGTGGTGGTCCAGCTTT-3'     |
| IL-6           | fwd 5'-TTGCCTTCTTGGGACTGATG-3'      |
|                | rev 5'-ACAGGTCTGTTGGGAGTGGT-3'      |
| ITGB8          | fwd 5'-AGTGAACACAATAGATGTGGCTC-3'   |
|                | rev 5'-TTCCTGATCCACCTGAAACAAAA-3'   |
| Foxp3          | fwd 5'-ACTGGGGTCTTCTCCCTCAA-3'      |
|                | rev 5'-CGTGGGAAGGTGCAGAGTAG-3'      |
| IL-10          | fwd 5'-TTTGAATTCCCTGGGTGAGAA-3'     |
|                | rev 5'-GCTCCACTGCCTTGCTCTTATT-3'    |
| TGF- $\beta$ 1 | fwd 5'-CCCGAAGCGGACTACTATGC-3'      |
|                | rev 5'-CGAATGTCTGACGTATTGAAGAACA-3' |
| TGF- $\beta$ 2 | fwd 5'-CACCCAGCGCTACATCGATAG-3'     |
|                | rev 5'-CAGCGTCTGTCACGTCGAA-3'       |
